# Supplementary material
Source: Springer Nature journal article supplement (https://www.springermedizin.de/resource/supplementary/12876_2010_562_MOESM5_ESM.pdf/9437262)

**A**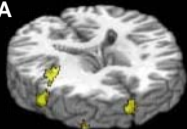**Control**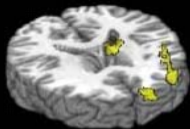**RE**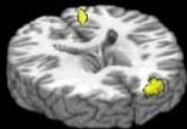**NERD+**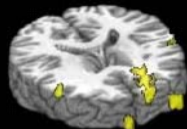**NERD-SI+**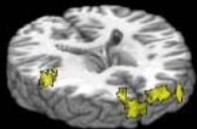**NERD-SI-****B**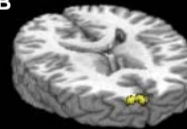**Control**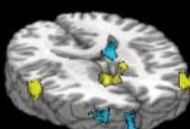**RE**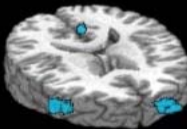**NERD+**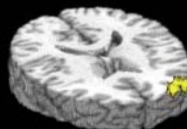**NERD-SI+**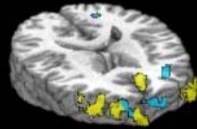**NERD-SI-**

Supplement: MOESM5 [file 9437262]
